# Supplementary material for: Sodium storage in hard carbon with curved graphene platelets as the basic structural units
Source: Royal Society of Chemistry journal article supplement (doi:10.1039/c8ta11510a), 2019-01-01
Supplement: c8ta11510a2.pdf [file c8ta11510a2.pdf]

## Supplementary Materials for

### **Sodium storage in hard carbon with curved graphene platelets as the basic structural units**

Ke Wang<sup>#ac</sup>, Yaobin Xu<sup>#c</sup>, Yuan Li<sup>c</sup>, Vinayak Dravid<sup>c</sup>, Jinsong Wu<sup>\*abc</sup>, Ying Huang<sup>\*a</sup>

<sup>a</sup>MOE Key Laboratory of Material Physics and Chemistry under Extraordinary Conditions, Ministry of Education, School of Science, Northwestern Polytechnical University, Xi'an 710072, PR China. E-mail: yingh@nwpu.edu.cn

<sup>b</sup>Nanostructure Research Centre, State Key Laboratory of Advanced Technology for Materials Synthesis and Processing, Wuhan University of Technology, 122 Luoshui Road, 430070 Wuhan, Hubei, China. E-mail: wujs@whut.edu.cn;

<sup>c</sup>Department of Materials Science and Engineering, NUANCE Center, Northwestern University, Evanston, Illinois 60208, USA

<sup>#</sup>These authors contributed equally to this work.

**Table of Contents:**

- I. Supplementary Figures S1 to S7
- II. Supplementary Formula S1 to S4
- III. Supplementary Video S1

## I. Supplementary Figure

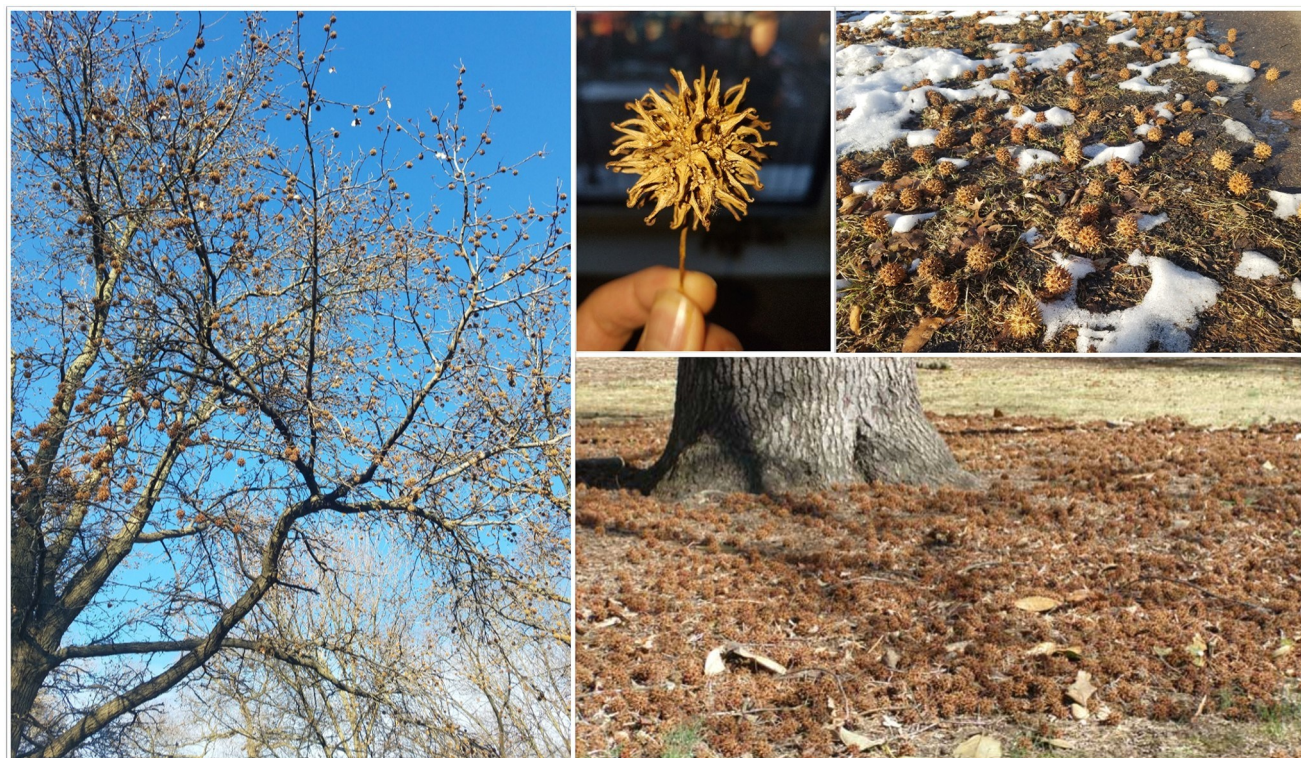

**Fig. S1** Photographs of sweet-gum tree and sweet gum.

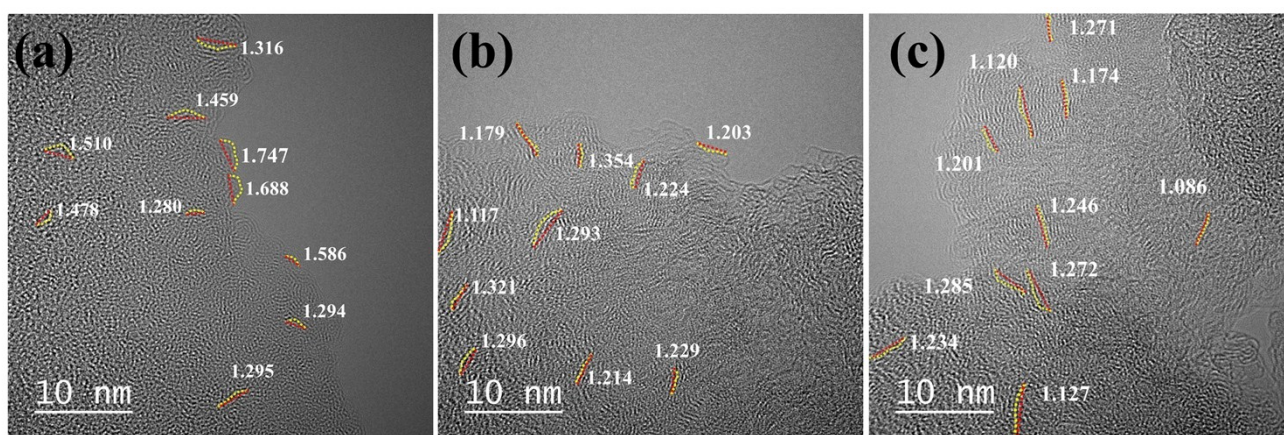

**Fig. S2** The curvature of graphene layer measured for the hard carbon processed at (a) 800, (b) 1000 and (c) 1200°C. The curvature is measured by dividing the actual length of a graphene (yellow dotted lines) with the length of the straight line connecting the beginning and ending points (red dotted lines).

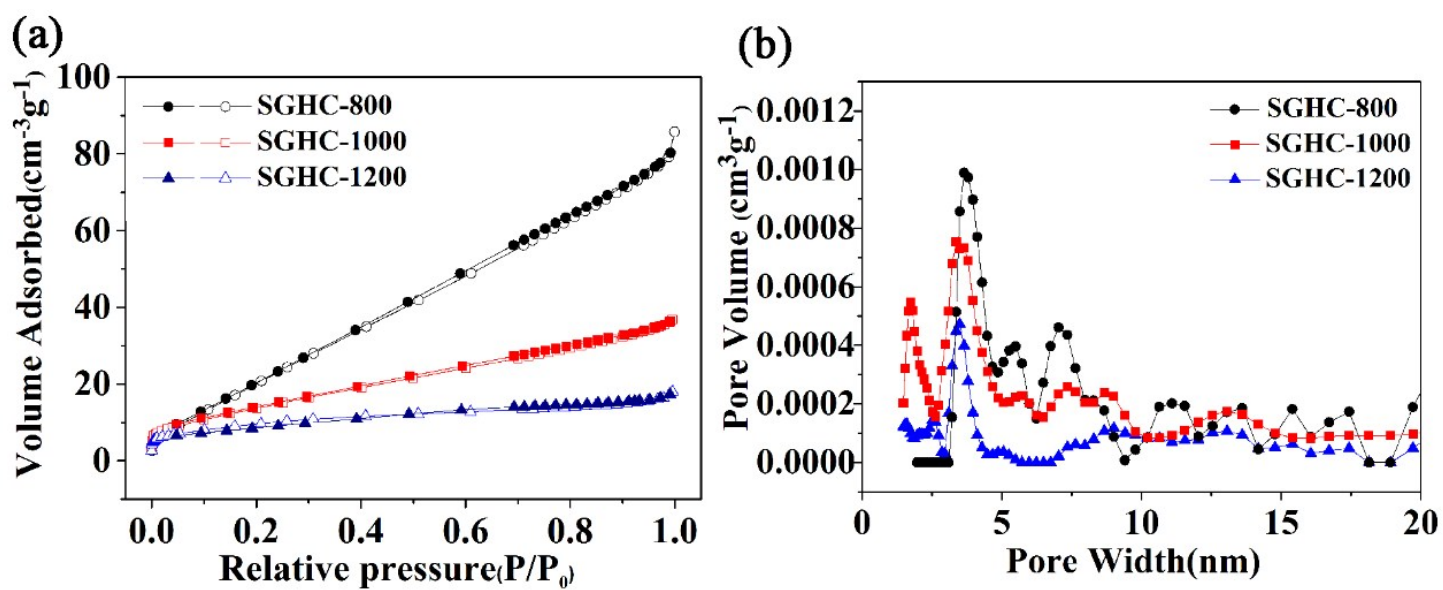

**Fig. S3**  $N_2$  adsorption/desorption isotherms (a) and the pore size distribution curve (b) of SGHC-800, SGHC-1000 and SGHC-1200.



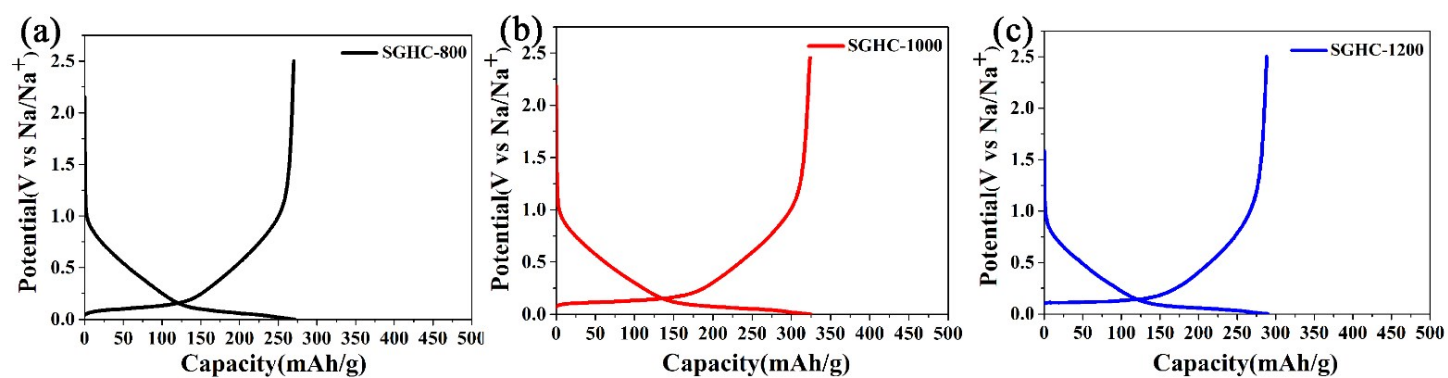

**Fig. S4** Discharge/charge curves of (a) SGHC-800, (b) SGHC-1000 and (c) SGHC-1200 at a current density of 50 mA g<sup>-1</sup> for 40th cycle.

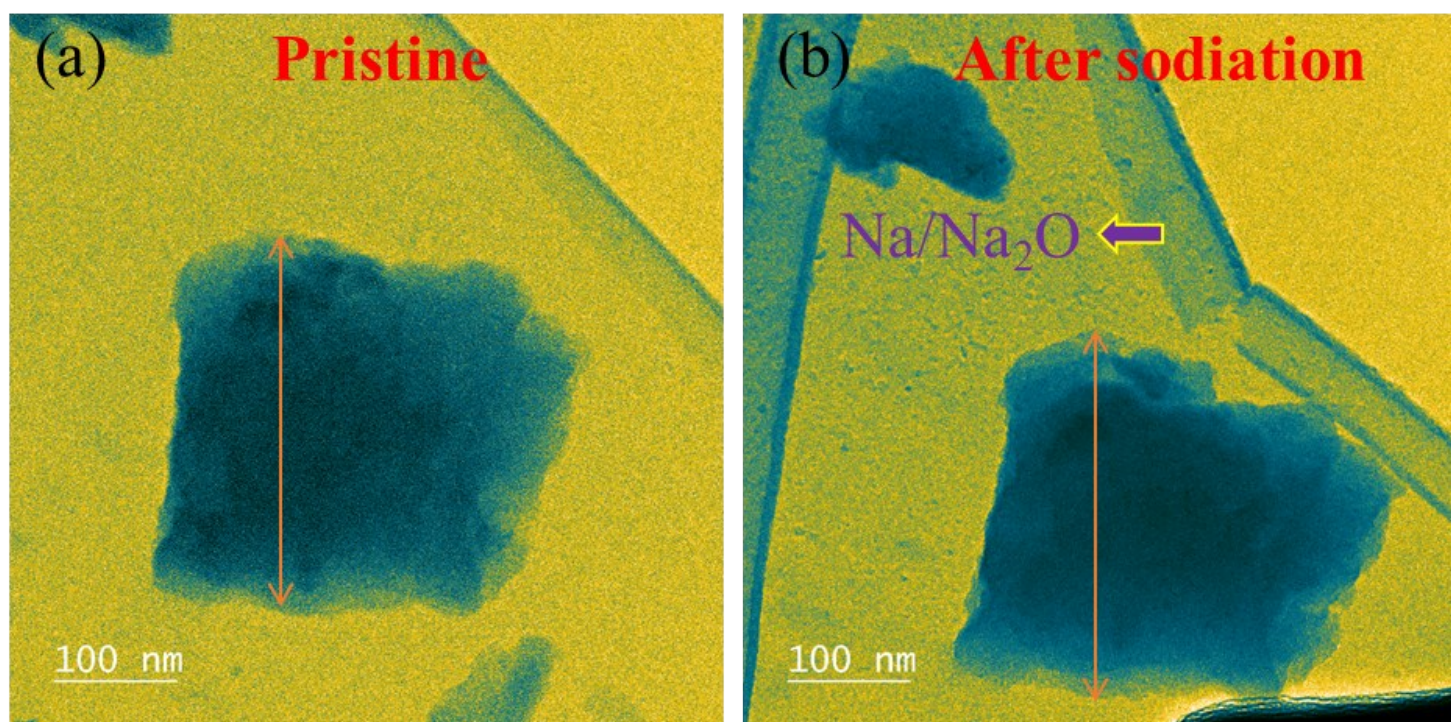

**Fig. S5** Low-magnification TEM image of SGHC-1000 particle, before sodiation (a) and after sodiation (b).

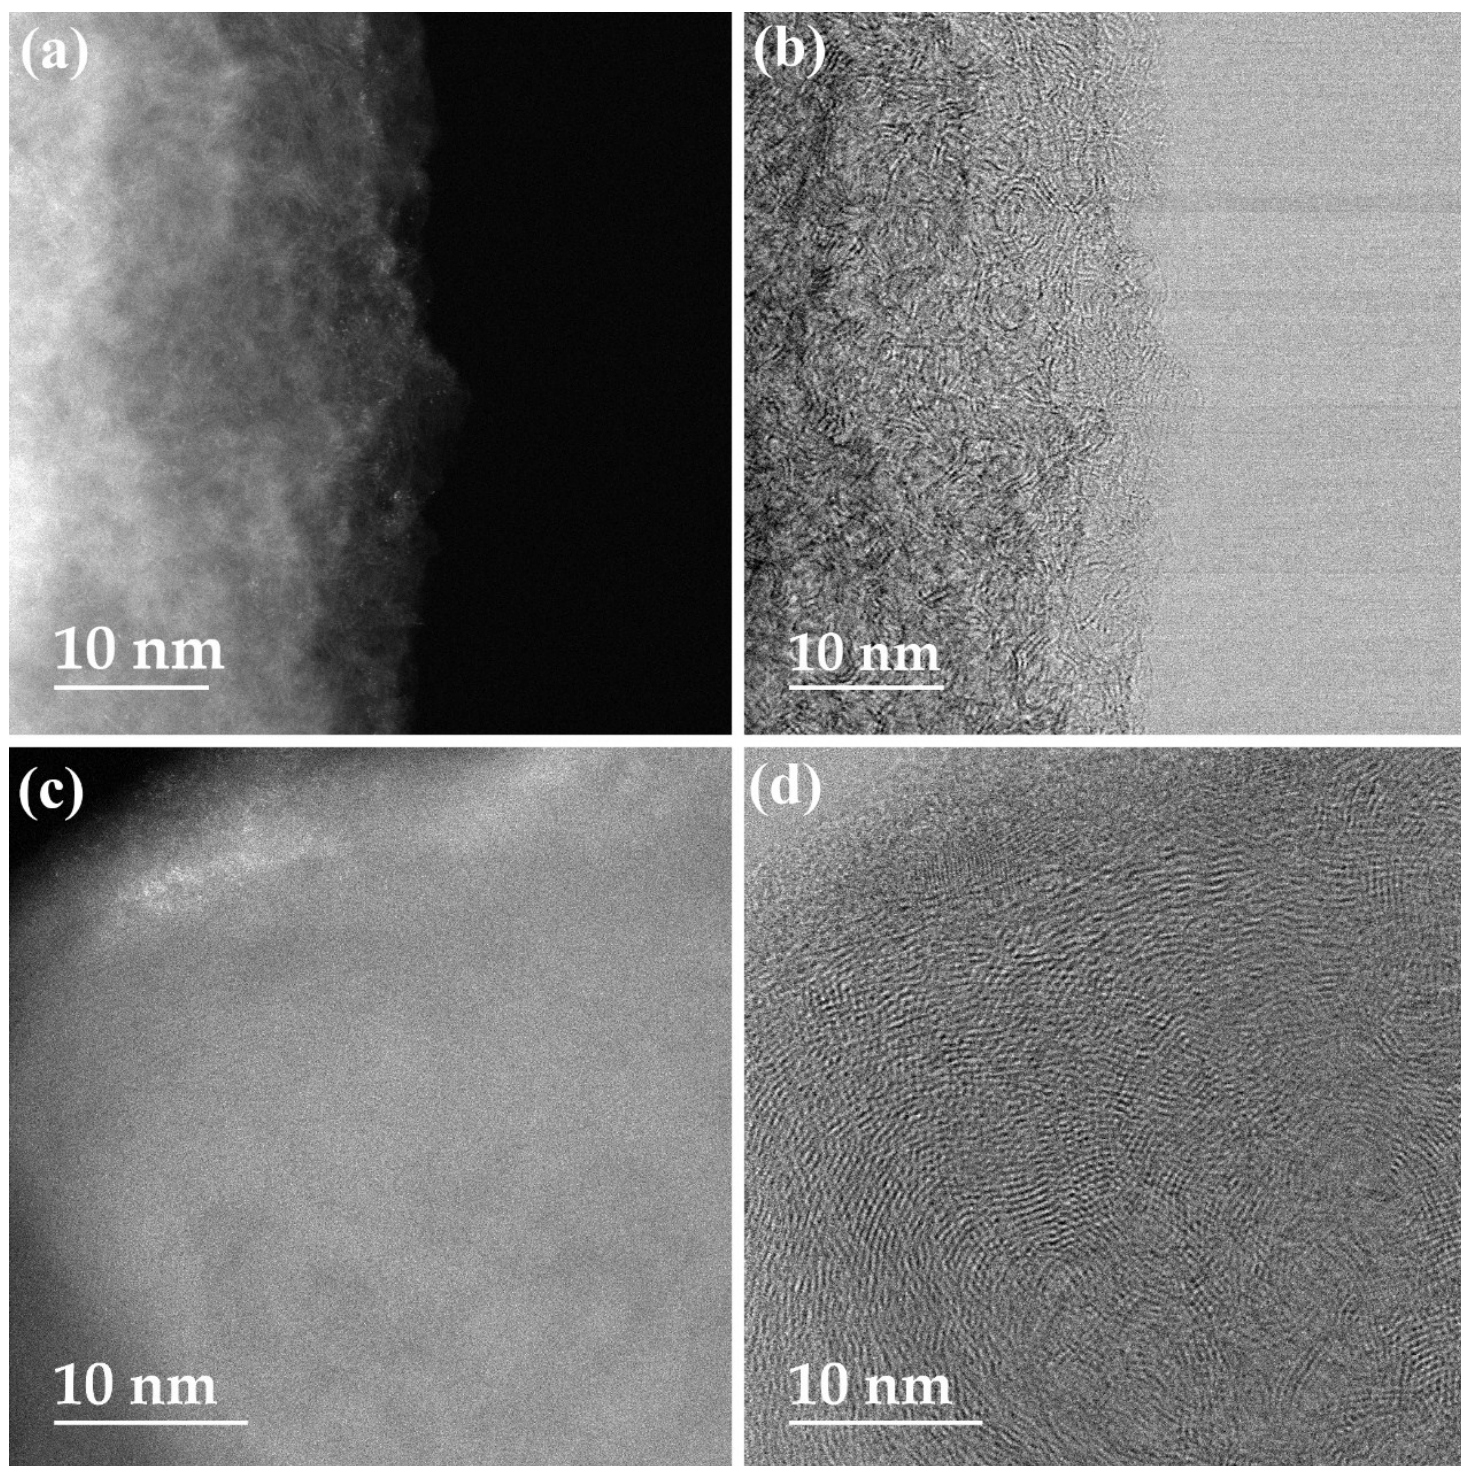

**Fig. S6** STEM images of a pristine SGHC-1000 particle before cycle collected by a high-angle annular dark field detector (a) and a bright field detector (b). STEM images of a SGHC-1000 particle cycled 100 cycles at a current density of  $50 \text{ mA g}^{-1}$  collected by a high-angle annular dark field detector (c) and a bright field detector (d).



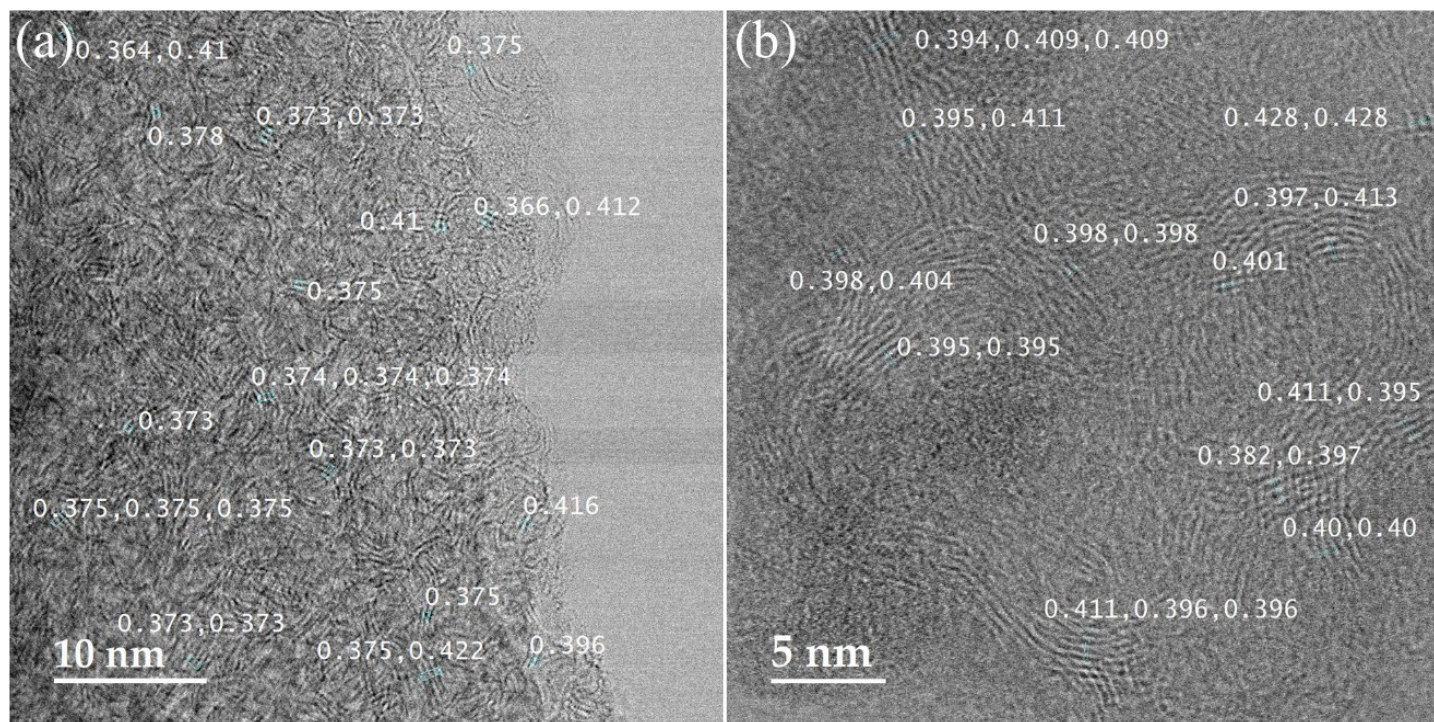

**Fig. S7** STEM images of a SGHC-1000 particle before cycle (a), after 100 cycles at a current density of 50 mA g<sup>-1</sup> (b). The graphene interlayer distance are measured and labeled.

## II. Formula for parameters of hard carbon

$$d_{002} = \frac{\gamma}{2\sin\theta_{002}} \quad \text{S1}$$

$$Lc = \frac{0.89 * \gamma}{B_{002} * \cos\theta_{002}} \quad \text{S2}$$

$$n = \frac{Lc}{d_{002}} \quad \text{S3}$$

$$La = \frac{1.77 * \gamma}{B_{100} * \cos\theta_{100}} \quad \text{S4}$$

The parameters (graphene interlayer distance  $d_{002}$ , thickness of graphene layers  $Lc$ , number of graphene layers  $n$ , average lateral length  $La$ ) are calculated from the x-ray diffraction spectra, where  $\lambda$  is the wavelength of Cu  $K\alpha$  radiation,  $\theta$  is the diffraction angle in radians, and  $B$  is the half maximum intensity in radians.

### **III. Supplementary Video**

**Video S1.** In-situ TEM observation of sodiation of SGHC-1000 hard carbon particle under a potential bias of -3V. The frame speed is 64-times faster than real time.
